# Supplementary material for: Evaluating, Screening and Selecting Yardlong Bean [Vigna unguiculata subsp. sesquipedalis (L.) Verdc.] for Resistance to Common Cutworm (Spodoptera litura Fabricius)
Source: MDPI journal article supplement (doi:10.3390/agronomy13020502), 2023-02-09
Supplement: s1 [file s1]

Table S1: Analysis of the wormhole number and length in pods of three maturity types of yardlong bean varieties.

| Maturity types | Wormhole number |       |      | Wormhole length |          |         |
|----------------|-----------------|-------|------|-----------------|----------|---------|
|                | Maximum         | Minim | Mean | Maximum/cm      | Minim/cm | Mean/cm |
| Early          | 10              | 0     | 2.48 | 4.0             | 0.4      | 1.34    |
| Medium         | 7               | 0     | 3.13 | 3.7             | 0.4      | 1.42    |
| Late           | 5               | 0     | 1.21 | 4.1             | 0.2      | 1.31    |

Table S2: Sixty-four yardlong bean varieties screened by evaluation of newly hatched larvae and 4<sup>th</sup> instar larvae weight increase.

| Variety                    | Origin                                     | 4th LW/g | LW9/g |
|----------------------------|--------------------------------------------|----------|-------|
| Fudingchangjiangdou        | Fuding, Fujian                             | 0.438    | 0.085 |
| Yixujiangdou               | Fuzhou, Fujian                             | 0.265    | 0.032 |
| Jianglechangjiangdou       | Jiangle, Fujian                            | 0.055    | 0.041 |
| Lianchengqingkuaijiangdou  | Liancheng, Fujian                          | 0.636    | 0.063 |
| Changtingbaopihongjiangdou | Changting, Fujian                          | 0.497    | 0.125 |
| Hongrenfendou              | Chenghai, Guangdong                        | 0.480    | 0.068 |
| Zhuzaidou                  | Guangzhou, Guangdong                       | 0.297    | 0.203 |
| Luoqundai                  | Guangzhou, Guangdong                       | 0.448    | 0.044 |
| Erlubai                    | Guangzhou, Guangdong                       | 0.245    | 0.066 |
| Suijiao101                 | Guangzhou, Guangdong                       | 0.301    | 0.066 |
| Qingpibai                  | Taishan, Guangdong                         | 0.335    | 0.072 |
| Shanghaibaidoujiao         | Shanghai                                   | 0.147    | 0.041 |
| Baijiangdou                | Danzhai, Guizhou                           | 0.067    | 0.016 |
| Damijiang                  | Shuicheng, Guizhou                         | 0.226    | 0.032 |
| Qingjiangdou               | Sinan, Guizhou                             | 0.246    | 0.033 |
| Caidoujiao                 | Wuqiao, Hebei                              | 0.207    | 0.127 |
| Changcaidou                | Zanhuang, Hebei                            | 0.067    | 0.033 |
| Xinxiangchangdoujiao       | Xinxiang, Henan                            | 0.067    | .     |
| Heizijiangdou              | Zhaodong, Heilongjiang                     | 0.054    | 0.042 |
| Jiangdou No.5              | Wuhan, Hubei                               | 0.031    | 0.033 |
| Chunqihongzipijiangdou     | Wuhan, Hubei                               | 0.057    | 0.048 |
| Zhijianggezao No.30        | Wuhan, Hubei                               | 0.017    | 0.019 |
| Lvlingjiaolong             | Nanjing, Jiangsu                           | 0.339    | 0.026 |
| Youxuanchangdoujiao28-2    | Nanjing, Jiangsu                           | 0.379    | 0.053 |
| SS-97                      | Nanjing, Jiangsu                           | 0.095    | 0.027 |
| Suzi41                     | Nanjing, Jiangsu                           | 0.051    | 0.034 |
| Suijiang1419               | Nanjing, Jiangsu                           | 0.033    | 0.034 |
| j-3                        | Nanjing, Jiangsu                           | 0.079    | 0.059 |
| j-4                        | Nanjing, Jiangsu                           | 0.118    | 0.058 |
| j-5                        | Nanjing, Jiangsu                           | 0.057    | 0.025 |
| Suijiang52                 | Nanjing, Jiangsu                           | 0.204    | 0.008 |
| Suijiang11                 | Nanjing, Jiangsu                           | 0.446    | 0.020 |
| Suijiang12                 | Nanjing, Jiangsu                           | 0.083    | 0.017 |
| Zhuweuijiang               | Yancheng, Jiangsu                          | 0.317    | 0.019 |
| Dabaitiaojiangdou          | Shenyang, Liaoning                         | 0.077    | 0.015 |
| Duanbaitiaojiangdou        | Shenyang, Liaoning                         | 0.407    | 0.009 |
| Yinchuandijiangdou         | Yinchuan, Ningxia                          | 0.311    | 0.024 |
| Qiuzijiang                 | Xian, Shanxi                               | 0.385    | 0.019 |
| Baipangzijiangdou          | Chengdu, Sichuan                           | 0.597    | 0.047 |
| Yidianhong                 | Shanghai                                   | 0.614    | 0.014 |
| Hongzuiyan                 | Chengdu, Sichuan                           | 0.360    | 0.017 |
| Paojiangdou-1              | Yaan, Sichuan                              | 0.160    | 0.035 |
| Paojiangdou-2              | Yaan, Sichuan                              | 0.069    | 0.012 |
| Gaochan No.4               | Shantou, Guangdong                         | 0.090    | 0.013 |
| Zhenjiang No.1             | Zhenjiang, Jiangsu                         | 0.234    | 0.029 |
| Qingtiaojiangdou           | Wuxian, Xinjiang                           | 0.205    | 0.024 |
| Laohualianpo               | Guangdong                                  | 0.122    | 0.012 |
| Pingtangjiangdou           | Guizhou                                    | 0.047    | 0.027 |
| Qingjiang80                | Dingzhou, Hebei                            | 0.116    | 0.028 |
| Zijiangdou                 | Dingzhou, Hebei                            | 0.400    | 0.043 |
| 156Fanjiang                | Wuhan, Hubei                               | 0.299    | 0.097 |
| HC-1-63-5-1                | Wuhan, Hubei                               | 0.108    | 0.022 |
| Techangjiangdou201         | Wuhan, Hubei                               | 0.229    | 0.051 |
| Yandaijiang                | Baoshan, Shanghai                          | 0.106    | 0.019 |
| Suijiang No.3              | Jiangsu Academy of Agricultural Sciences   | 0.141    | 0.017 |
| j-1                        | Jiangsu Academy of Agricultural Sciences   | 0.091    | 0.015 |
| Feicui                     | Guangdong Academy of Agricultural Sciences | 0.089    | 0.034 |
| Suijiang No.1              | Jiangsu Academy of Agricultural Sciences   | 0.094    | 0.023 |
| Baipadou                   | Kuancheng, Hebei                           | 0.101    | 0.021 |
| Jiangdou2045               | Wuhan, Hubei                               | 0.083    | 0.025 |
| JDMS009                    | Wuhan, Hubei                               | 0.697    | 0.034 |
| Baichengbaijiangdou        | Baicheng, Jiling                           | 0.116    | 0.044 |
| Jijiang No.1               | Baicheng, Jiling                           | 0.081    | 0.040 |
| Fanjiang                   | Jinshan, Shanghai                          | 0.150    | 0.024 |

4th LW means the 72 h fresh weight increase of the 4th instar larvae. LW9 means the nine-day-old larval weight.

Table S3: The joint ANOVA of the number of common cutworms on different organs and varieties at different observation times.

| Source of Variation | DF  | SS     | MS     | F      | <i>p</i> (>F) |
|---------------------|-----|--------|--------|--------|---------------|
| Variety             | 3   | 0.58   | 0.19   | 0.15   | 0.9281        |
| Organ               | 2   | 520.17 | 260.08 | 203.54 | <.0001        |
| Time                | 2   | 0.80   | 0.40   | 0.31   | 0.7343        |
| Variety×Organ       | 6   | 11.17  | 1.86   | 1.46   | 0.2001        |
| Variety×Time        | 6   | 0.88   | 0.15   | 0.11   | 0.9946        |
| Organ×Time          | 4   | 1.42   | 0.35   | 0.28   | 0.8922        |
| Variety×Organ×Time  | 12  | 12.75  | 1.06   | 0.83   | 0.6179        |
| Error               | 108 | 138.00 | 1.28   |        |               |

DF: degree of freedom; SS: sum of squares; MS: mean square; F: F value. *p*: *p* value.
